# Supplementary material for: Petrophysical characterization of high-rank coal by nuclear magnetic resonance: a case study of the Baijiao coal reservoir, SW China
Source: R Soc Open Sci. 2018 Dec 12;5(12):181411. doi: 10.1098/rsos.181411 (PMC6304127; doi:10.1098/rsos.181411)
Supplement: T2 curve of coal samples [file rsos181411supp1.xlsx]

## Sheet: sample 1
Times	saturatd sample	centrifuge sample
0.01	0.016038	0.015425
0.01072	0.032773	0.03152
0.01149	0.063327	0.060905
0.01232	0.11368	0.109332
0.0132	0.197043	0.189506
0.01415	0.343076	0.329947
0.01517	0.571594	0.549707
0.01626	0.923235	0.887851
0.01743	1.42294	1.36834
0.01868	2.11956	2.03807
0.02002	3.06005	2.94211
0.02146	4.2933	4.1273
0.023	5.91968	5.68991
0.02466	7.89939	7.59138
0.02643	10.3146	9.9104
0.02833	13.3156	12.7908
0.03037	16.74	16.0767
0.03255	20.7035	19.8789
0.03489	25.227	24.2179
0.0374	30.5656	29.3395
0.04009	36.2869	34.8298
0.04297	42.596	40.8881
0.04606	49.4885	47.5133
0.04937	57.3819	55.1101
0.05292	65.4558	62.8954
0.05672	74.0638	71.214
0.0608	83.1747	80.0418
0.06517	93.4121	89.9853
0.06986	103.465	99.7886
0.07488	113.88	109.983
0.08026	124.591	120.511
0.08604	136.445	132.197
0.09222	147.575	143.237
0.09885	158.745	154.372
0.10596	169.848	165.501
0.11357	181.943	177.655
0.12174	192.61	188.473
0.13049	202.834	198.909
0.13987	212.475	208.821
0.14993	222.764	219.414
0.16071	230.837	227.861
0.17226	237.882	235.318
0.18464	243.758	241.634
0.19792	249.806	248.128
0.21215	252.946	251.729
0.2274	254.537	253.77
0.24374	254.488	254.144
0.26127	254.174	254.211
0.28005	250.632	250.991
0.30018	245.321	245.928
0.32176	238.262	239.026
0.3449	230.772	231.592
0.36969	220.348	221.102
0.39627	208.441	208.998
0.42476	195.208	195.432
0.45529	181.794	181.543
0.48803	166.411	165.541
0.52311	150.34	148.715
0.56072	133.836	131.327
0.60103	117.759	114.237
0.64424	101.093	96.4739
0.69055	84.7882	79.0016
0.7402	69.7883	62.718
0.79341	55.3372	46.9412
0.85045	41.6731	31.9387
0.91159	29.0103	17.9555
0.97712	17.5336	5.2059
1.04737	7.3931	0
1.12267	0	0
1.20338	0	0
1.28989	0	0
1.38262	0	0
1.48202	0	0
1.58857	0	0
1.70277	0	0
1.82518	0	0
1.9564	0	0
2.09705	0.31162	0
2.24781	1.23343	0
2.4094	2.64938	0.023142
2.58262	4.45078	0.644698
2.76829	6.54389	1.89555
2.9673	10.146	3.659
3.18063	15.5678	5.83897
3.40929	20.847	8.40642
3.65438	25.8794	13.5679
3.9171	30.5775	19.0321
4.19871	34.87	24.0394
4.50056	38.7023	28.5156
4.82411	42.035	32.4045
5.17092	44.8439	35.6665
5.54267	47.118	38.2784
5.94113	48.859	40.2318
6.36825	50.0789	41.5321
6.82607	50.7994	42.1972
7.31681	51.0496	42.2558
7.84282	50.8651	41.7461
8.40665	50.2862	40.7143
9.01102	49.3567	39.2133
9.65883	48.1224	37.3006
10.3532	46.63	35.0377
11.0975	44.9262	32.4878
11.8953	43.0563	29.7152
12.7505	41.0634	26.7836
13.6672	38.9877	23.7547
14.6497	36.866	20.6878
15.7029	34.7311	17.6384
16.8318	32.6113	14.6574
18.0419	30.5307	11.7911
19.3389	28.5089	9.07995
20.7292	26.5612	6.5587
22.2195	24.6988	4.25594
23.8169	22.9291	2.19383
25.5291	21.2557	0.387918
27.3644	19.6791	0
29.3317	18.1967	0
31.4404	16.8027	0
33.7006	15.4891	0
36.1234	14.2451	0
38.7204	13.0578	0
41.504	11.9126	0
44.4878	10.7933	0
47.6861	9.68283	0
51.1143	8.5639	0
54.789	7.41952	0
58.7279	6.23376	0
62.9499	4.99233	0
67.4754	5.12446	0
72.3263	5.48646	0
77.526	5.76739	0
83.0994	5.93102	0
89.0735	5.96577	0
95.4772	5.86338	0
102.341	5.62661	0
109.699	5.25978	0
117.585	4.76989	0
126.038	4.16707	0
135.099	3.46374	0
144.812	2.67229	0
155.223	1.80563	0
166.382	0.877111	0
178.343	0	0
191.164	0	0
204.907	0	0
219.639	0	0
235.429	0	0
252.354	0	0
270.496	0	0
289.942	0	0
310.787	0	0
333.129	0	0
357.079	0	0
382.749	0	0
410.266	0	0
439.76	0	0
471.375	0	0
505.263	0	0
541.587	0	0
580.523	0	0
622.257	0	0
666.992	0	0
714.943	0	0
766.341	0	0
821.434	0	0
880.488	0	0
943.788	0	0
1011.64	0	0
1084.37	0	0
1162.32	0	0
1245.88	0	0
1335.45	0	0
1431.46	0	0
1534.37	0	0
1644.68	0	0
1762.91	0	0
1889.65	0	0
2025.5	0	0
2171.12	0	0
2327.2	0	0
2494.51	0	0
2673.84	0	0
2866.07	0	0
3072.11	0	0
3292.97	0	0
3529.71	0	0
3783.46	0	0
4055.46	0	0
4347.01	0	0
4659.53	0	0
4994.51	0	0
5353.57	0	0
5738.44	0	0
6150.99	0	0
6593.19	0	0
7067.18	0	0
7575.25	0	0
8119.84	0	0
8703.59	0	0
9329.3	0	0
10000	0	0

## Sheet: sample 2
times	saturated sample	centrifuge sample
0.01	0.015042	0.013683
0.01072	0.030738	0.02796
0.01149	0.059394	0.054026
0.01232	0.106618	0.096984
0.0132	0.184798	0.168105
0.01415	0.32174	0.292694
0.01517	0.536006	0.487661
0.01626	0.865651	0.787685
0.01743	1.33396	1.21407
0.01868	1.98654	1.80853
0.02002	2.86706	2.6112
0.02146	4.0208	3.66392
0.023	5.54094	5.05258
0.02466	7.38905	6.74355
0.02643	9.6406	8.80755
0.02833	12.434	11.3736
0.03037	15.6158	14.3044
0.03255	19.2919	17.7005
0.03489	23.4801	21.5821
0.0374	28.4165	26.1712
0.04009	33.6988	31.1021
0.04297	39.5192	36.5562
0.04606	45.8769	42.5372
0.04937	53.1641	49.4139
0.05292	60.6285	56.4917
0.05672	68.6082	64.0874
0.0608	77.0869	72.1887
0.06517	86.6579	81.355
0.06986	96.1224	90.464
0.07488	106.004	100.008
0.08026	116.261	109.946
0.08604	127.703	121.048
0.09222	138.603	131.678
0.09885	149.69	142.522
0.10596	160.877	153.495
0.11357	173.182	165.57
0.12174	184.319	176.558
0.13049	195.224	187.347
0.13987	205.765	197.805
0.14993	217.141	209.082
0.16071	226.566	218.492
0.17226	235.183	227.127
0.18464	242.843	234.838
0.19792	250.883	242.913
0.21215	256.208	248.354
0.2274	260.154	252.446
0.24374	262.609	255.077
0.26127	264.986	257.617
0.28005	264.184	257.049
0.30018	261.678	254.803
0.32176	257.454	250.865
0.3449	252.911	246.598
0.36969	245.276	239.3
0.39627	236.059	230.447
0.42476	225.372	220.151
0.45529	214.485	209.657
0.48803	201.23	196.849
0.52311	187.008	183.1
0.56072	172.036	168.623
0.60103	157.348	154.43
0.64424	141.505	139.107
0.69055	125.646	123.764
0.7402	111.123	109.724
0.79341	96.7735	95.8358
0.85045	82.8478	82.3313
0.91159	69.5803	69.4284
0.97712	57.1853	57.3253
1.04737	45.8498	46.1952
1.12267	35.7285	36.1812
1.20338	26.9399	27.394
1.28989	19.5638	19.9092
1.38262	13.6405	13.7666
1.48202	9.17178	8.97147
1.58857	6.12282	5.49566
1.70277	4.4257	3.28089
1.82518	3.9836	2.24224
1.9564	4.67586	2.2725
2.09705	6.3633	3.24674
2.24781	8.89373	5.02714
2.4094	12.1075	7.46776
2.58262	15.8425	10.419
2.76829	19.9392	13.7321
2.9673	24.2445	17.2626
3.18063	28.6156	20.8739
3.40929	32.9226	24.4404
3.65438	37.0506	27.8493
3.9171	40.9014	31.0026
4.19871	44.3941	33.8183
4.50056	47.465	36.2312
4.82411	50.0677	38.1928
5.17092	52.1718	39.6713
5.54267	53.7624	40.6507
5.94113	54.8382	41.13
6.36825	55.4102	41.1218
6.82607	55.4999	40.6505
7.31681	55.1381	39.7512
7.84282	54.3627	38.4673
8.40665	53.217	36.8491
9.01102	51.7485	34.9517
9.65883	50.0072	32.8331
10.3532	48.0435	30.5529
11.0975	45.9079	28.1701
11.8953	43.6488	25.742
12.7505	41.312	23.3226
13.6672	38.9397	20.9613
14.6497	36.5698	18.7024
15.7029	34.2356	16.5836
16.8318	31.9651	14.636
18.0419	29.7815	12.8831
19.3389	27.7027	11.3412
20.7292	25.7418	10.0187
22.2195	23.9072	8.91679
23.8169	22.2027	8.02968
25.5291	20.6279	7.34489
27.3644	19.1785	6.50402
29.3317	17.8463	6.19219
31.4404	16.6199	5.85151
33.7006	15.4847	5.45335
36.1234	14.4234	5.02028
38.7204	13.4167	4.34336
41.504	12.4434	3.90809
44.4878	11.4816	3.22339
47.6861	10.5092	2.08473
51.1143	9.50448	1.27941
54.789	8.44739	0.879409
58.7279	7.31982	0
62.9499	6.10648	0
67.4754	5.50815	0
72.3263	5.88034	0
77.526	6.15825	0
83.0994	6.31503	0
89.0735	6.33657	0
95.4772	6.2177	0
102.341	5.9595	0
109.699	5.56752	0
117.585	5.05051	0
126.038	4.41986	0
135.099	3.68745	0
144.812	2.86636	0
155.223	1.97036	0
166.382	1.01317	0
178.343	0.008081	0
191.164	0	0
204.907	0	0
219.639	0	0
235.429	0	0
252.354	0	0
270.496	0	0
289.942	0	0
310.787	0	0
333.129	0	0
357.079	0	0
382.749	0	0
410.266	0	0
439.76	0	0
471.375	0	0
505.263	0	0
541.587	0	0
580.523	0	0
622.257	0	0
666.992	0	0
714.943	0	0
766.341	0	0
821.434	0	0
880.488	0	0
943.788	0	0
1011.64	0	0
1084.37	0	0
1162.32	0	0
1245.88	0	0
1335.45	0	0
1431.46	0	0
1534.37	0	0
1644.68	0	0
1762.91	0	0
1889.65	0	0
2025.5	0	0
2171.12	0	0
2327.2	0	0
2494.51	0	0
2673.84	0	0
2866.07	0	0
3072.11	0	0
3292.97	0	0
3529.71	0	0
3783.46	0	0
4055.46	0	0
4347.01	0	0
4659.53	0	0
4994.51	0	0
5353.57	0	0
5738.44	0	0
6150.99	0	0
6593.19	0	0
7067.18	0	0
7575.25	0	0
8119.84	0	0
8703.59	0	0
9329.3	0	0
10000	0	0

## Sheet: sample 3
times	saturated sample	centrifuge sample
0.01	0.009877	0.009901
0.01072	0.020183	0.020232
0.01149	0.039	0.039094
0.01232	0.070009	0.070179
0.0132	0.121346	0.121644
0.01415	0.211273	0.211802
0.01517	0.351987	0.352892
0.01626	0.568497	0.57002
0.01743	0.876137	0.87862
0.01868	1.30493	1.30891
0.02002	1.8837	1.89002
0.02146	2.64243	2.65233
0.023	3.64277	3.65822
0.02466	4.86008	4.88365
0.02643	6.34496	6.3803
0.02833	8.18998	8.24238
0.03037	10.2961	10.3715
0.03255	12.7359	12.8419
0.03489	15.5251	15.6704
0.0374	18.8249	19.0209
0.04009	22.3757	22.6315
0.04297	26.3126	26.6383
0.04606	30.6448	31.0497
0.04937	35.6467	36.1421
0.05292	40.8283	41.4164
0.05672	46.4302	47.1129
0.0608	52.4577	53.2335
0.06517	59.3346	60.2038
0.06986	66.2615	67.2086
0.07488	73.6137	74.6246
0.08026	81.3806	82.4375
0.08604	90.1539	91.243
0.09222	98.7387	99.8287
0.09885	107.661	108.726
0.10596	116.874	117.887
0.11357	127.141	128.08
0.12174	136.802	137.633
0.13049	146.544	147.241
0.13987	156.27	156.809
0.14993	166.903	167.264
0.16071	176.307	176.468
0.17226	185.334	185.281
0.18464	193.846	193.568
0.19792	202.9	202.389
0.21215	209.976	209.233
0.2274	216.096	215.128
0.24374	221.122	219.939
0.26127	226.21	224.821
0.28005	228.671	227.106
0.30018	229.689	227.974
0.32176	229.186	227.354
0.3449	228.361	226.438
0.36969	224.664	222.698
0.39627	219.379	217.409
0.42476	212.547	210.61
0.45529	205.327	203.445
0.48803	195.603	193.812
0.52311	184.653	182.972
0.56072	172.649	171.083
0.60103	160.602	159.135
0.64424	147.02	145.641
0.69055	133.028	131.701
0.7402	120.054	118.718
0.79341	106.87	105.464
0.85045	93.721	92.1733
0.91159	80.8484	79.0768
0.97712	68.4807	66.3979
1.04737	56.8277	54.3443
1.12267	46.0741	43.1021
1.20338	36.3745	32.8313
1.28989	27.8502	23.6615
1.38262	20.5866	15.6901
1.48202	14.6332	8.98052
1.58857	10.0042	3.56264
1.70277	6.68037	0
1.82518	4.61253	0
1.9564	3.72488	0
2.09705	3.91955	0
2.24781	5.08117	0
2.4094	7.08149	0.165098
2.58262	9.78395	0.919233
2.76829	13.048	2.1909
2.9673	16.7331	4.34906
3.18063	20.7019	8.00361
3.40929	24.824	11.8996
3.65438	28.9773	15.913
3.9171	33.0512	19.9285
4.19871	36.9472	23.8411
4.50056	40.5803	27.5578
4.82411	43.8798	30.9981
5.17092	46.7888	34.0948
5.54267	49.2652	36.7942
5.94113	51.2801	39.056
6.36825	52.818	40.853
6.82607	53.8755	42.1704
7.31681	54.4603	43.0053
7.84282	54.5898	43.3652
8.40665	54.2899	43.2673
9.01102	53.5935	42.7375
9.65883	52.5389	41.8085
10.3532	51.1683	40.5191
11.0975	49.5266	38.9129
11.8953	47.6598	37.0368
12.7505	45.6137	34.9401
13.6672	43.4329	32.6735
14.6497	41.1602	30.2879
15.7029	38.835	27.8332
16.8318	36.4933	25.3576
18.0419	34.167	22.9065
19.3389	31.8835	20.5217
20.7292	29.6653	18.2401
22.2195	27.5303	16.0935
23.8169	25.4912	14.1072
25.5291	23.5562	12.3002
27.3644	21.7287	10.6841
29.3317	20.0078	9.26322
31.4404	18.3886	8.03474
33.7006	16.8629	6.98862
36.1234	15.4193	6.10831
38.7204	14.0443	5.37141
41.504	12.7225	4.75073
44.4878	11.4377	4.21543
47.6861	10.1735	3.73236
51.1143	8.91385	3.26751
54.789	7.64402	2.82518
58.7279	6.35076	1.99486
62.9499	5.02303	1.34125
67.4754	3.93199	0.664948
72.3263	4.36329	0
77.526	4.73596	0
83.0994	5.02347	0
89.0735	5.21202	0
95.4772	5.29491	0
102.341	5.27023	0
109.699	5.1413	0
117.585	4.91418	0
126.038	4.59682	0
135.099	4.1984	0
144.812	3.72882	0
155.223	3.1983	0
166.382	2.61702	0
178.343	1.99486	0
191.164	1.34125	0
204.907	0.664948	0
219.639	0	0
235.429	0	0
252.354	0	0
270.496	0	0
289.942	0	0
310.787	0	0
333.129	0	0
357.079	0	0
382.749	0	0
410.266	0	0
439.76	0	0
471.375	0	0
505.263	0	0
541.587	0	0
580.523	0	0
622.257	0	0
666.992	0	0
714.943	0	0
766.341	0	0
821.434	0	0
880.488	0	0
943.788	0	0
1011.64	0	0
1084.37	0	0
1162.32	0	0
1245.88	0	0
1335.45	0	0
1431.46	0	0
1534.37	0	0
1644.68	0	0
1762.91	0	0
1889.65	0	0
2025.5	0	0
2171.12	0	0
2327.2	0	0
2494.51	0	0
2673.84	0	0
2866.07	0	0
3072.11	0	0
3292.97	0	0
3529.71	0	0
3783.46	0	0
4055.46	0	0
4347.01	0	0
4659.53	0	0
4994.51	0	0
5353.57	0	0
5738.44	0	0
6150.99	0	0
6593.19	0	0
7067.18	0	0
7575.25	0	0
8119.84	0	0
8703.59	0	0
9329.3	0	0
10000	0	0

## Sheet: sample 4
times	saturated sample	centrifuge sample
0.01	0.013831	0.013257
0.01072	0.028262	0.027091
0.01149	0.05461	0.052348
0.01232	0.098033	0.093975
0.0132	0.169925	0.162901
0.01415	0.295871	0.283665
0.01517	0.492971	0.472702
0.01626	0.796307	0.763732
0.01743	1.22746	1.17762
0.01868	1.82869	1.75523
0.02002	2.64075	2.53621
0.02146	3.70624	3.56236
0.023	5.11249	4.919
0.02466	6.82621	6.57605
0.02643	8.92004	8.60591
0.02833	11.5262	11.1395
0.03037	14.5079	14.0482
0.03255	17.9695	17.4371
0.03489	21.9353	21.3335
0.0374	26.6352	25.9655
0.04009	31.7025	30.9791
0.04297	37.3268	36.5614
0.04606	43.5177	42.7232
0.04937	50.6588	49.8422
0.05292	58.0442	57.224
0.05672	66.0026	65.1896
0.0608	74.5248	73.7274
0.06517	84.1922	83.4101
0.06986	93.8459	93.0867
0.07488	103.993	103.255
0.08026	114.592	113.868
0.08604	126.441	125.717
0.09222	137.832	137.098
0.09885	149.474	148.713
0.10596	161.275	160.467
0.11357	174.252	173.37
0.12174	186.096	185.122
0.13049	197.733	196.648
0.13987	209.016	207.801
0.14993	221.152	219.786
0.16071	231.289	229.775
0.17226	240.57	238.909
0.18464	248.823	247.024
0.19792	257.403	255.471
0.21215	263.118	261.088
0.2274	267.322	265.219
0.24374	269.887	267.736
0.26127	272.258	270.068
0.28005	271.244	269.039
0.30018	268.36	266.141
0.32176	263.601	261.351
0.3449	258.407	256.079
0.36969	249.958	247.508
0.39627	239.821	237.176
0.42476	228.134	225.2
0.45529	216.204	212.857
0.48803	201.866	198.004
0.52311	186.564	182.064
0.56072	170.539	165.278
0.60103	154.834	148.662
0.64424	138.046	130.884
0.69055	121.319	113.075
0.7402	105.961	96.4684
0.79341	90.8484	80.0351
0.85045	76.2317	64.0481
0.91159	62.3425	48.7651
0.97712	49.3891	34.4215
1.04737	37.5511	21.2234
1.12267	26.9749	9.34277
1.20338	17.7708	0
1.28989	10.0114	0
1.38262	3.73134	0
1.48202	0	0
1.58857	0	0
1.70277	0	0
1.82518	0	0
1.9564	0.021567	0
2.09705	0.575315	0
2.24781	1.69372	0
2.4094	3.27623	0.317919
2.58262	5.23583	1.23863
2.76829	8.26407	2.66135
2.9673	12.715	4.50675
3.18063	17.3159	6.64658
3.40929	21.9376	9.0038
3.65438	26.463	11.4307
3.9171	30.7887	13.8962
4.19871	34.8259	16.423
4.50056	38.5008	18.9312
4.82411	41.7547	21.2694
5.17092	44.5438	24.3393
5.54267	46.8386	26.9404
5.94113	48.6234	29.004
6.36825	49.895	30.5293
6.82607	50.6615	31.5277
7.31681	50.9417	32.022
7.84282	50.7629	32.044
8.40665	50.1602	31.6337
9.01102	49.1745	30.8368
9.65883	47.8516	29.7038
10.3532	46.2403	28.2882
11.0975	44.3914	26.6448
11.8953	42.3559	24.8287
12.7505	40.184	22.8939
13.6672	37.924	20.8921
14.6497	35.6208	18.8713
15.7029	33.3153	16.8756
16.8318	31.0437	14.9434
18.0419	28.8365	13.1077
19.3389	26.7185	11.395
20.7292	24.7079	9.82509
22.2195	22.8169	8.41107
23.8169	21.0513	7.15932
25.5291	19.4109	6.06971
27.3644	17.8897	5.13609
29.3317	16.4765	4.34675
31.4404	15.1554	3.68518
33.7006	13.9069	3.13077
36.1234	12.7083	2.65975
38.7204	11.5347	2.24608
41.504	10.3603	1.86241
44.4878	9.15913	1.60109
47.6861	7.90615	0.647487
51.1143	6.57819	0
54.789	5.15479	0
58.7279	4.90847	0
62.9499	5.39245	0
67.4754	5.75381	0
72.3263	6.0026	0
77.526	6.12703	0
83.0994	6.10891	0
89.0735	5.93902	0
95.4772	5.61626	0
102.341	5.14538	0
109.699	4.53513	0
117.585	3.79709	0
126.038	2.94518	0
135.099	1.99344	0
144.812	0.956582	0
155.223	0	0
166.382	0	0
178.343	0	0
191.164	0	0
204.907	0	0
219.639	0	0
235.429	0	0
252.354	0	0
270.496	0	0
289.942	0	0
310.787	0	0
333.129	0	0
357.079	0	0
382.749	0	0
410.266	0	0
439.76	0	0
471.375	0	0
505.263	0	0
541.587	0	0
580.523	0	0
622.257	0	0
666.992	0	0
714.943	0	0
766.341	0	0
821.434	0	0
880.488	0	0
943.788	0	0
1011.64	0	0
1084.37	0	0
1162.32	0	0
1245.88	0	0
1335.45	0	0
1431.46	0	0
1534.37	0	0
1644.68	0	0
1762.91	0	0
1889.65	0	0
2025.5	0	0
2171.12	0	0
2327.2	0	0
2494.51	0	0
2673.84	0	0
2866.07	0	0
3072.11	0	0
3292.97	0	0
3529.71	0	0
3783.46	0	0
4055.46	0	0
4347.01	0	0
4659.53	0	0
4994.51	0	0
5353.57	0	0
5738.44	0	0
6150.99	0	0
6593.19	0	0
7067.18	0	0
7575.25	0	0
8119.84	0	0
8703.59	0	0
9329.3	0	0
10000	0	0

## Sheet: sample 5
times	saturated sample	centrifuge sample
0.01	0.014697	0.013157
0.01072	0.030033	0.026884
0.01149	0.058033	0.051949
0.01232	0.104176	0.093255
0.0132	0.18057	0.161643
0.01415	0.314395	0.281446
0.01517	0.52381	0.46893
0.01626	0.846054	0.757453
0.01743	1.30399	1.16752
0.01868	1.94238	1.7393
0.02002	2.80427	2.51148
0.02146	3.93449	3.52444
0.023	5.42509	4.86104
0.02466	7.2397	6.48933
0.02643	9.45392	8.4779
0.02833	12.2058	10.9518
0.03037	15.3473	13.7801
0.03255	18.9854	17.0608
0.03489	23.141	20.8155
0.0374	28.0503	25.2605
0.04009	33.3194	30.0454
0.04297	39.1402	35.3478
0.04606	45.5128	41.1738
0.04937	52.8269	47.8832
0.05292	60.3332	54.8054
0.05672	68.3631	62.2484
0.0608	76.8943	70.2012
0.06517	86.5109	79.2083
0.06986	96.0068	88.1774
0.07488	105.893	97.585
0.08026	116.116	107.39
0.08604	127.473	118.342
0.09222	138.226	128.839
0.09885	149.093	139.548
0.10596	159.978	150.382
0.11357	171.885	162.29
0.12174	182.534	173.123
0.13049	192.854	183.747
0.13987	202.713	194.029
0.14993	213.289	205.092
0.16071	221.845	214.298
0.17226	229.512	222.714
0.18464	236.15	230.188
0.19792	243.066	237.978
0.21215	247.266	243.142
0.2274	250.062	246.935
0.24374	251.361	249.243
0.26127	252.527	251.4
0.28005	250.615	250.457
0.30018	247.056	247.812
0.32176	241.859	243.45
0.3449	236.354	238.696
0.36969	227.966	230.935
0.39627	218.14	221.608
0.42476	207.006	210.833
0.45529	195.755	199.811
0.48803	182.427	186.538
0.52311	168.338	172.344
0.56072	153.709	157.453
0.60103	139.482	142.825
0.64424	124.398	127.17
0.69055	109.488	111.548
0.7402	95.9317	97.1634
0.79341	82.7175	82.9899
0.85045	70.0654	69.2641
0.91159	58.1762	56.2076
0.97712	47.2264	44.0209
1.04737	37.3637	32.878
1.12267	28.7033	22.9217
1.20338	21.3265	14.261
1.28989	15.2798	6.96867
1.38262	10.5756	1.08098
1.48202	7.19404	0
1.58857	5.08583	0
1.70277	4.17558	0
1.82518	4.36603	0
1.9564	5.54234	0
2.09705	7.57668	0.147789
2.24781	10.3326	0.964359
2.4094	13.6693	2.37457
2.58262	17.4456	4.279
2.76829	21.5233	6.58682
2.9673	25.77	9.92414
3.18063	30.062	14.1061
3.40929	34.2858	18.2363
3.65438	38.3396	22.1978
3.9171	42.1345	25.8883
4.19871	45.5947	29.2214
4.50056	48.6581	32.1271
4.82411	51.2758	34.5523
5.17092	53.4125	36.4601
5.54267	55.045	37.8297
5.94113	56.1626	38.6558
6.36825	56.7658	38.9467
6.82607	56.8654	38.7239
7.31681	56.4819	38.0203
7.84282	55.6441	36.8781
8.40665	54.3883	35.348
9.01102	52.7568	33.4866
9.65883	50.7967	31.355
10.3532	48.5589	29.0173
11.0975	46.0964	26.538
11.8953	43.4633	23.9814
12.7505	40.7135	21.4093
13.6672	37.8995	18.8802
14.6497	35.0715	16.4475
15.7029	32.276	14.159
16.8318	29.5556	12.0556
18.0419	26.9477	10.1707
19.3389	24.4843	8.53012
20.7292	22.1911	7.15115
22.2195	20.0875	6.04306
23.8169	18.1863	5.20694
25.5291	16.4933	4.63607
27.3644	15.0078	4.3163
29.3317	13.7224	4.12672
31.4404	12.6237	3.9873
33.7006	11.6926	3.69553
36.1234	10.9051	3.41605
38.7204	10.2332	3.03651
41.504	9.64595	2.66622
44.4878	9.11052	2.32503
47.6861	8.59357	1.81496
51.1143	8.06235	1.42342
54.789	7.48594	1.03101
58.7279	6.83629	0.759219
62.9499	6.08913	0.415421
67.4754	6.01832	0.205141
72.3263	6.41358	0
77.526	6.70987	0
83.0994	6.86534	0
89.0735	6.86278	0
95.4772	6.69569	0
102.341	6.36511	0
109.699	5.87743	0
117.585	5.24294	0
126.038	4.47506	0
135.099	3.5873	0
144.812	2.59553	0
155.223	1.51605	0
166.382	0.365077	0
178.343	0	0
191.164	0	0
204.907	0	0
219.639	0	0
235.429	0	0
252.354	0	0
270.496	0	0
289.942	0	0
310.787	0	0
333.129	0	0
357.079	0	0
382.749	0	0
410.266	0	0
439.76	0	0
471.375	0	0
505.263	0	0
541.587	0	0
580.523	0	0
622.257	0	0
666.992	0	0
714.943	0	0
766.341	0	0
821.434	0	0
880.488	0	0
943.788	0	0
1011.64	0	0
1084.37	0	0
1162.32	0	0
1245.88	0	0
1335.45	0	0
1431.46	0	0
1534.37	0	0
1644.68	0	0
1762.91	0	0
1889.65	0	0
2025.5	0	0
2171.12	0	0
2327.2	0	0
2494.51	0	0
2673.84	0	0
2866.07	0	0
3072.11	0	0
3292.97	0	0
3529.71	0	0
3783.46	0	0
4055.46	0	0
4347.01	0	0
4659.53	0	0
4994.51	0	0
5353.57	0	0
5738.44	0	0
6150.99	0	0
6593.19	0	0
7067.18	0	0
7575.25	0	0
8119.84	0	0
8703.59	0	0
9329.3	0	0
10000	0	0

## Sheet: sample 6
times	saturated sample	centrifuge sample
0.01	0.01242	0.013157
0.01072	0.026422	0.026884
0.01149	0.054988	0.051949
0.01232	0.09712	0.093255
0.0132	0.164876	0.161643
0.01415	0.287075	0.281446
0.01517	0.478309	0.46893
0.01626	0.772602	0.757453
0.01743	1.19088	1.16752
0.01868	1.77409	1.7393
0.02002	2.56171	2.51148
0.02146	3.59492	3.52444
0.023	4.95826	4.86104
0.02466	6.61911	6.48933
0.02643	8.64746	8.4779
0.02833	11.1709	10.9518
0.03037	14.0557	13.7801
0.03255	17.402	17.0608
0.03489	21.2318	20.8155
0.0374	25.7657	25.2605
0.04009	30.6463	30.0454
0.04297	36.0548	35.3478
0.04606	41.9973	41.1738
0.04937	48.8409	47.8832
0.05292	55.9015	54.8054
0.05672	63.4934	62.2484
0.0608	71.6052	70.2012
0.06517	80.7925	79.2083
0.06986	89.9409	88.1774
0.07488	99.5367	97.585
0.08026	109.538	107.39
0.08604	120.709	118.342
0.09222	131.416	128.839
0.09885	142.339	139.548
0.10596	153.39	150.382
0.11357	165.536	162.29
0.12174	176.585	173.123
0.13049	187.422	183.747
0.13987	197.909	194.029
0.14993	209.194	205.092
0.16071	218.584	214.298
0.17226	227.168	222.714
0.18464	234.791	230.188
0.19792	242.738	237.978
0.21215	248.005	243.142
0.2274	251.874	246.935
0.24374	254.228	249.243
0.26127	256.428	251.4
0.28005	255.466	250.457
0.30018	252.768	247.812
0.32176	248.319	243.45
0.3449	243.47	238.696
0.36969	235.554	230.935
0.39627	226.04	221.608
0.42476	215.049	210.833
0.45529	203.807	199.811
0.48803	190.269	186.538
0.52311	175.791	172.344
0.56072	160.602	157.453
0.60103	145.682	142.825
0.64424	129.714	127.17
0.69055	113.779	111.548
0.7402	99.1067	97.1634
0.79341	84.6497	82.9899
0.85045	70.6494	69.2641
0.91159	57.3317	56.2076
0.97712	48.4163	44.0209
1.04737	39.4354	32.878
1.12267	31.5668	22.9217
1.20338	24.8512	14.261
1.28989	19.305	6.96867
1.38262	14.9211	1.08098
1.48202	11.6712	0
1.58857	9.50771	0
1.70277	8.36617	0
1.82518	8.16755	0
1.9564	8.82102	0
2.09705	10.2266	0.147789
2.24781	12.2777	0.964359
2.4094	14.864	2.37457
2.58262	17.8735	4.279
2.76829	21.195	6.58682
2.9673	24.7206	9.92414
3.18063	28.3468	14.1061
3.40929	31.977	18.2363
3.65438	35.522	22.1978
3.9171	38.902	25.8883
4.19871	42.0464	29.2214
4.50056	44.8952	32.1271
4.82411	47.3988	34.5523
5.17092	49.5185	36.4601
5.54267	51.2257	37.8297
5.94113	52.5026	38.6558
6.36825	53.341	38.9467
6.82607	53.742	38.7239
7.31681	53.7156	38.0203
7.84282	53.2794	36.8781
8.40665	52.4584	35.348
9.01102	51.2834	33.4866
9.65883	49.7904	31.355
10.3532	48.0193	29.0173
11.0975	46.0131	26.538
11.8953	43.8163	23.9814
12.7505	41.4741	21.4093
13.6672	39.0313	18.8802
14.6497	36.5314	16.4475
15.7029	34.0155	14.159
16.8318	31.5215	12.0556
18.0419	29.0835	10.1707
19.3389	26.731	8.53012
20.7292	24.4887	7.15115
22.2195	22.3758	6.04306
23.8169	20.4063	5.20694
25.5291	18.5881	4.63607
27.3644	16.9238	4.3163
29.3317	15.4103	3.92672
31.4404	14.0396	3.64034
33.7006	12.7985	3.32494
36.1234	11.6698	3.04411
38.7204	10.6324	2.73833
41.504	9.66245	2.42613
44.4878	8.73378	2.19545
47.6861	7.81899	1.8549
51.1143	6.89035	1.43502
54.789	5.92076	1.10954
58.7279	4.88473	0.746369
62.9499	4.05388	0.418494
67.4754	4.64005	0
72.3263	5.13361	0
77.526	5.52843	0
83.0994	5.84712	0
89.0735	6.03967	0
95.4772	6.08776	0
102.341	5.98391	0
109.699	5.72783	0
117.585	5.32432	0
126.038	4.78186	0
135.099	4.11162	0
144.812	3.32683	0
155.223	2.44136	0
166.382	1.46951	0
178.343	0.426204	0
191.164	0	0
204.907	0	0
219.639	0	0
235.429	0	0
252.354	0	0
270.496	0	0
289.942	0	0
310.787	0	0
333.129	0	0
357.079	0	0
382.749	0	0
410.266	0	0
439.76	0	0
471.375	0	0
505.263	0	0
541.587	0	0
580.523	0	0
622.257	0	0
666.992	0	0
714.943	0	0
766.341	0	0
821.434	0	0
880.488	0	0
943.788	0	0
1011.64	0	0
1084.37	0	0
1162.32	0	0
1245.88	0	0
1335.45	0	0
1431.46	0	0
1534.37	0	0
1644.68	0	0
1762.91	0	0
1889.65	0	0
2025.5	0	0
2171.12	0	0
2327.2	0	0
2494.51	0	0
2673.84	0	0
2866.07	0	0
3072.11	0	0
3292.97	0	0
3529.71	0	0
3783.46	0	0
4055.46	0	0
4347.01	0	0
4659.53	0	0
4994.51	0	0
5353.57	0	0
5738.44	0	0
6150.99	0	0
6593.19	0	0
7067.18	0	0
7575.25	0	0
8119.84	0	0
8703.59	0	0
9329.3	0	0
10000	0	0
